# Supplementary material for: Unlocking Drug Resistance in Multiple Myeloma: Adipocytes as Modulators of Treatment Response
Source: MDPI journal article supplement (doi:10.3390/cancers15174347), 2023-08-31
Supplement: s1 [file s1]

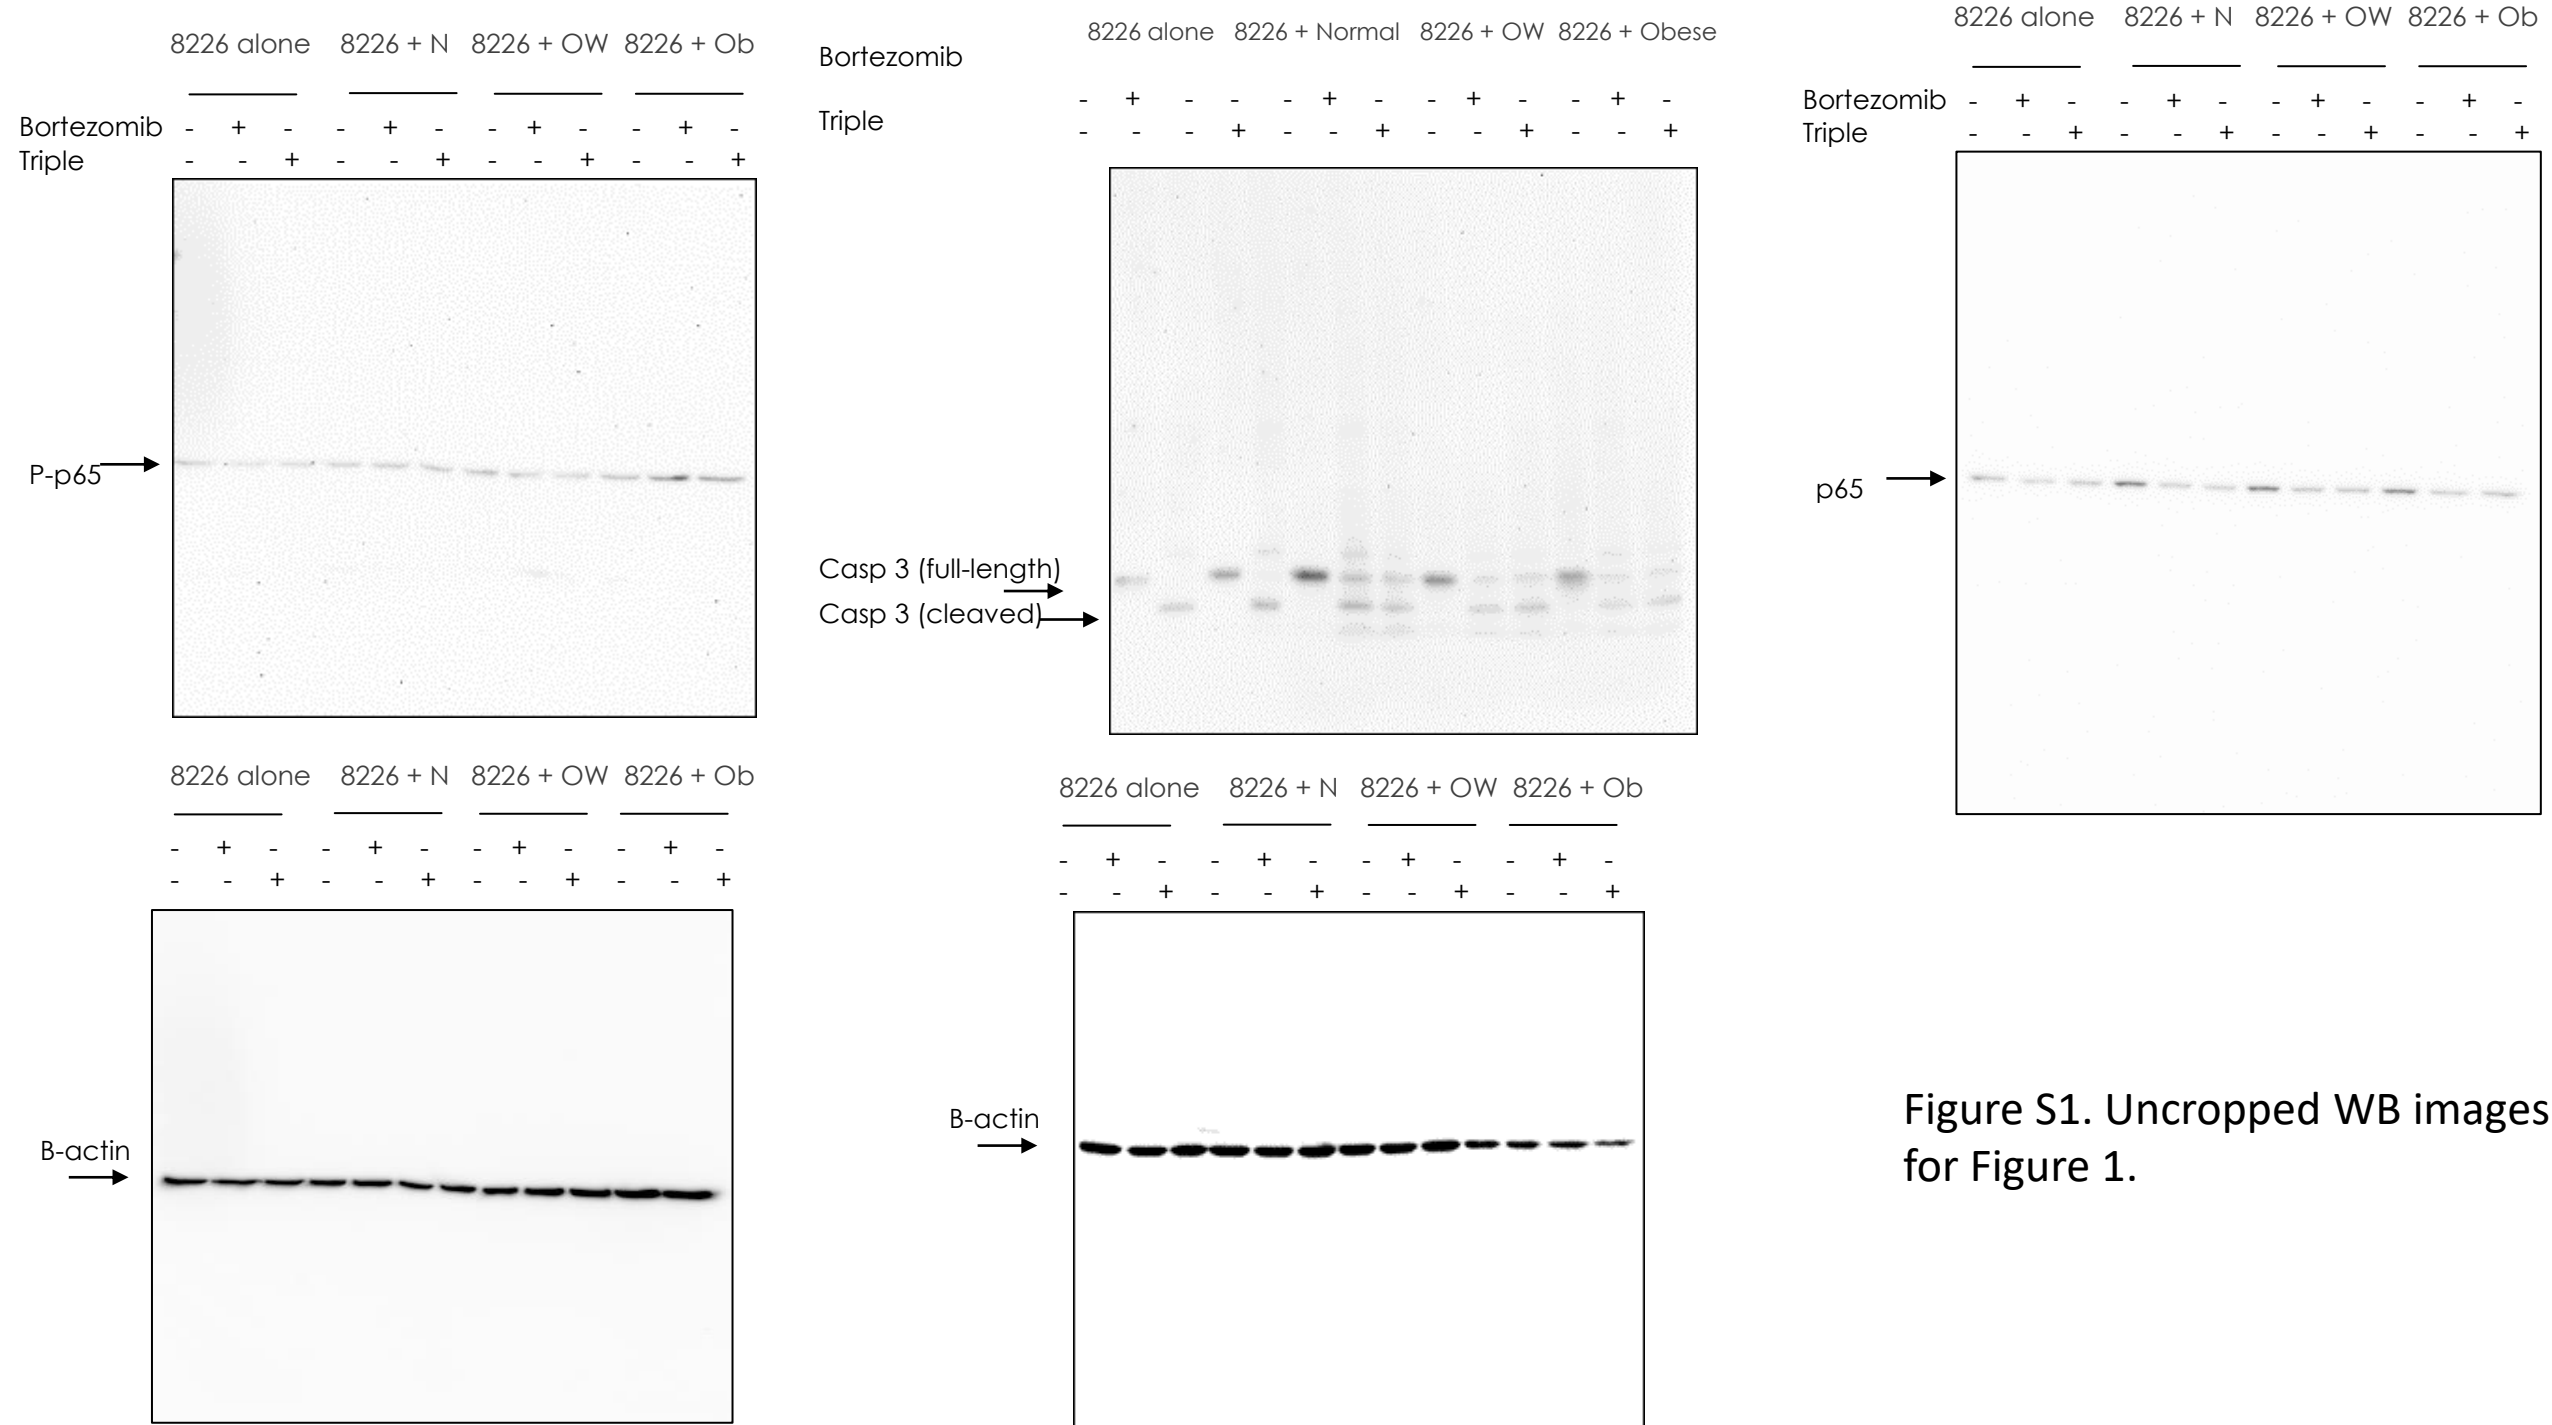

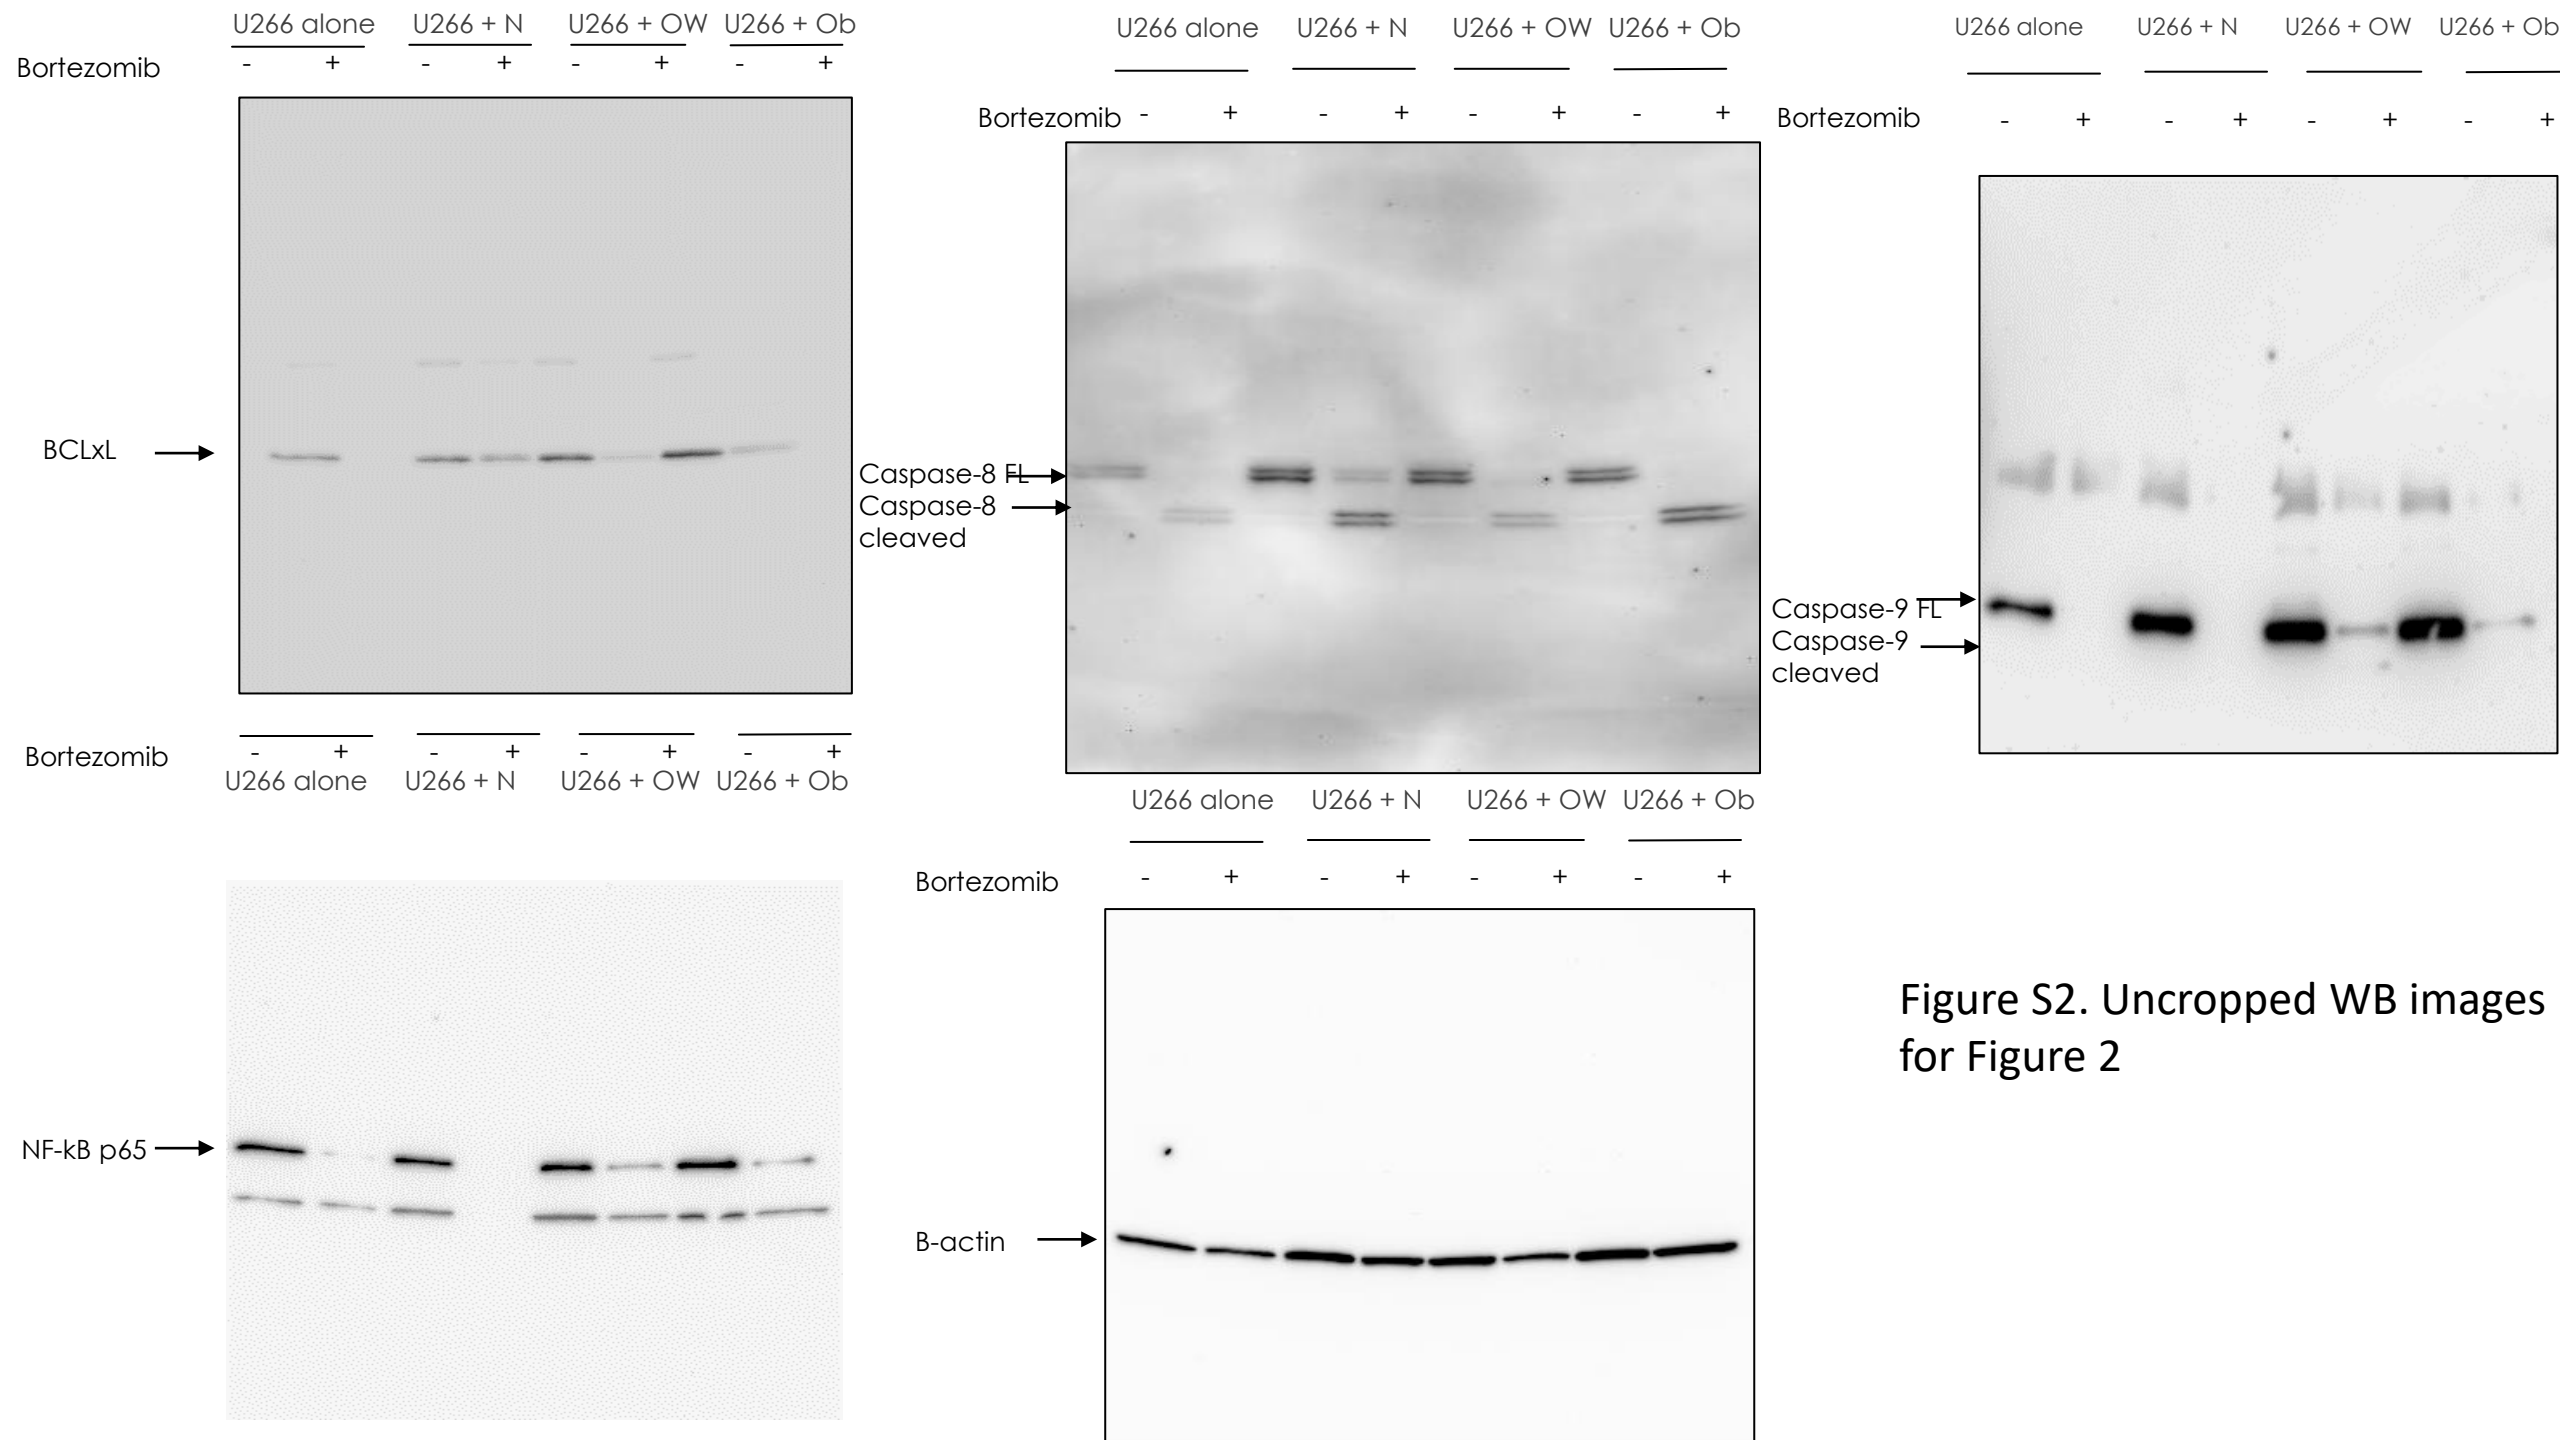

Figure S2. Uncropped WB images for Figure 2

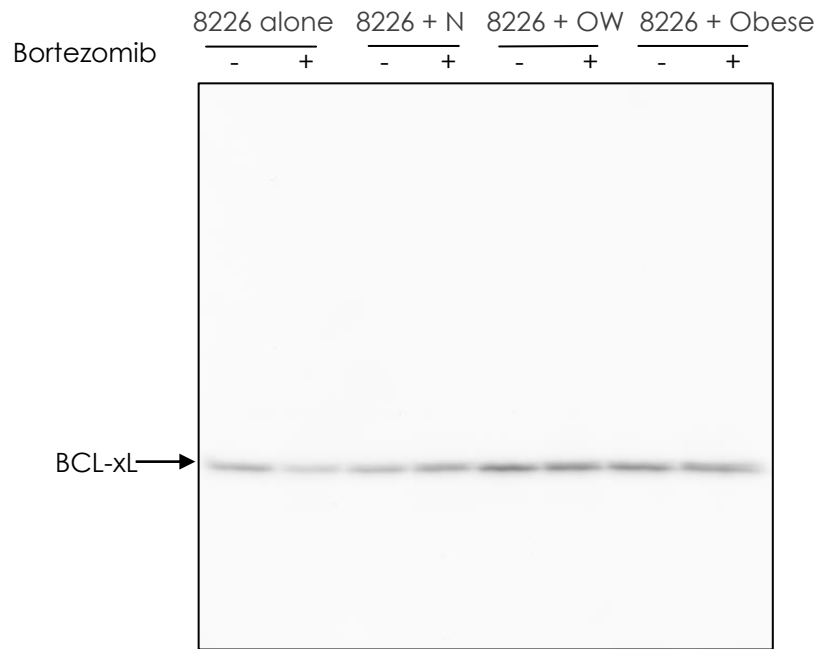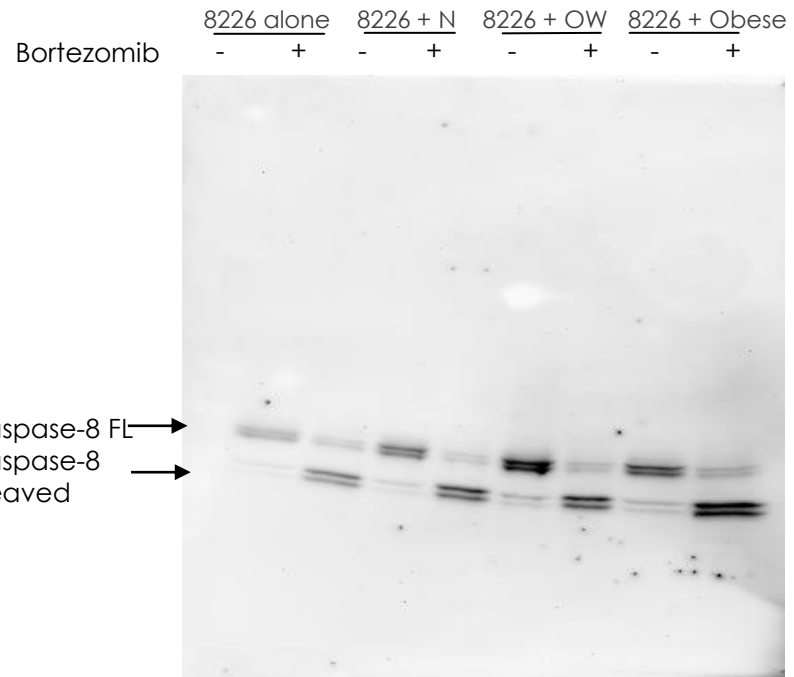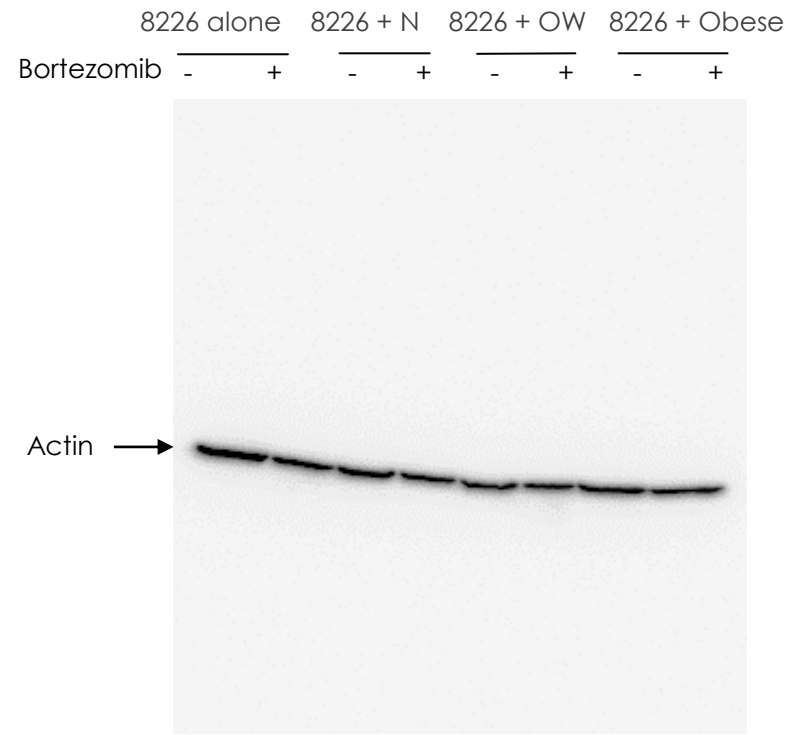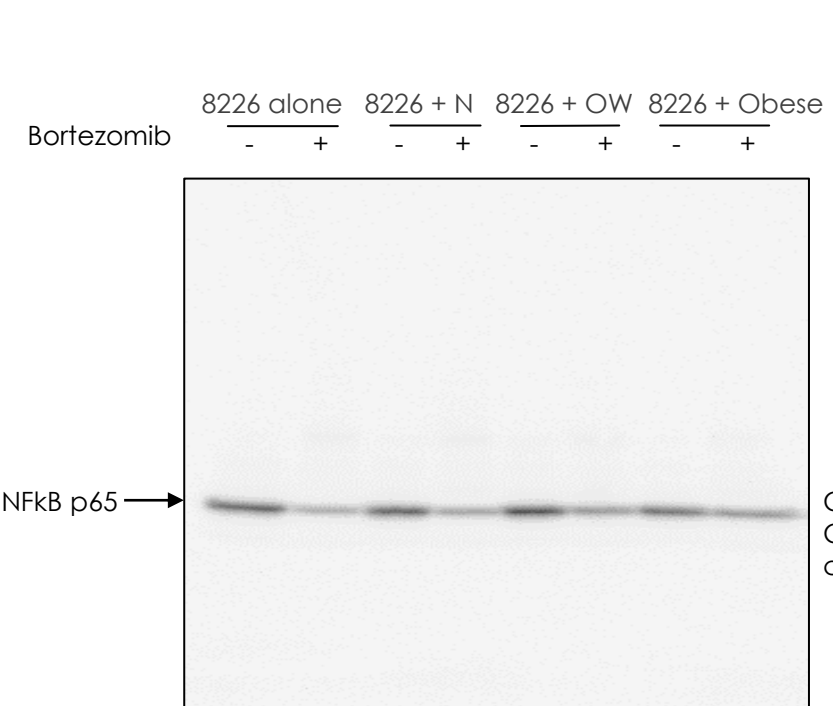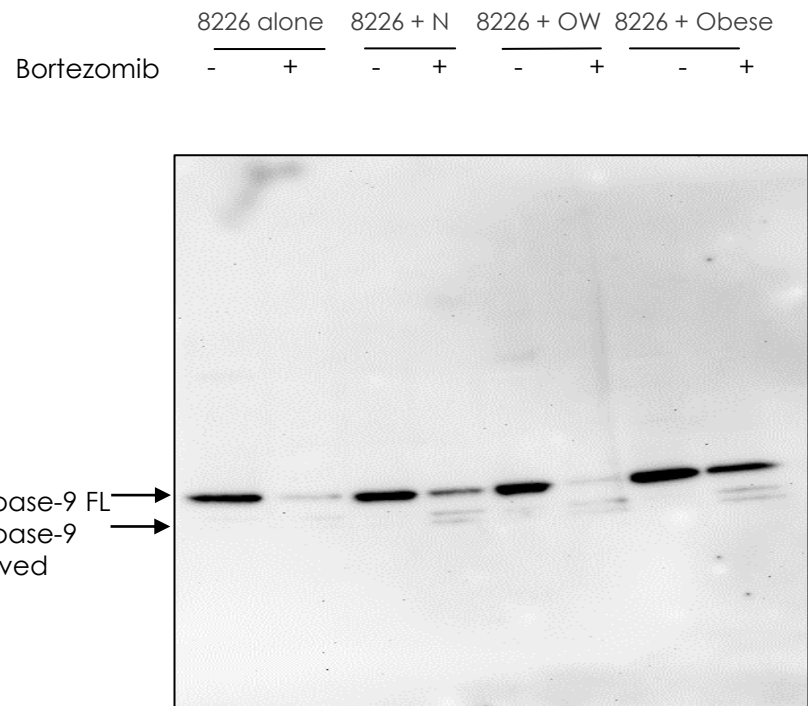

Figure S2. Uncropped WB images for Figure 2

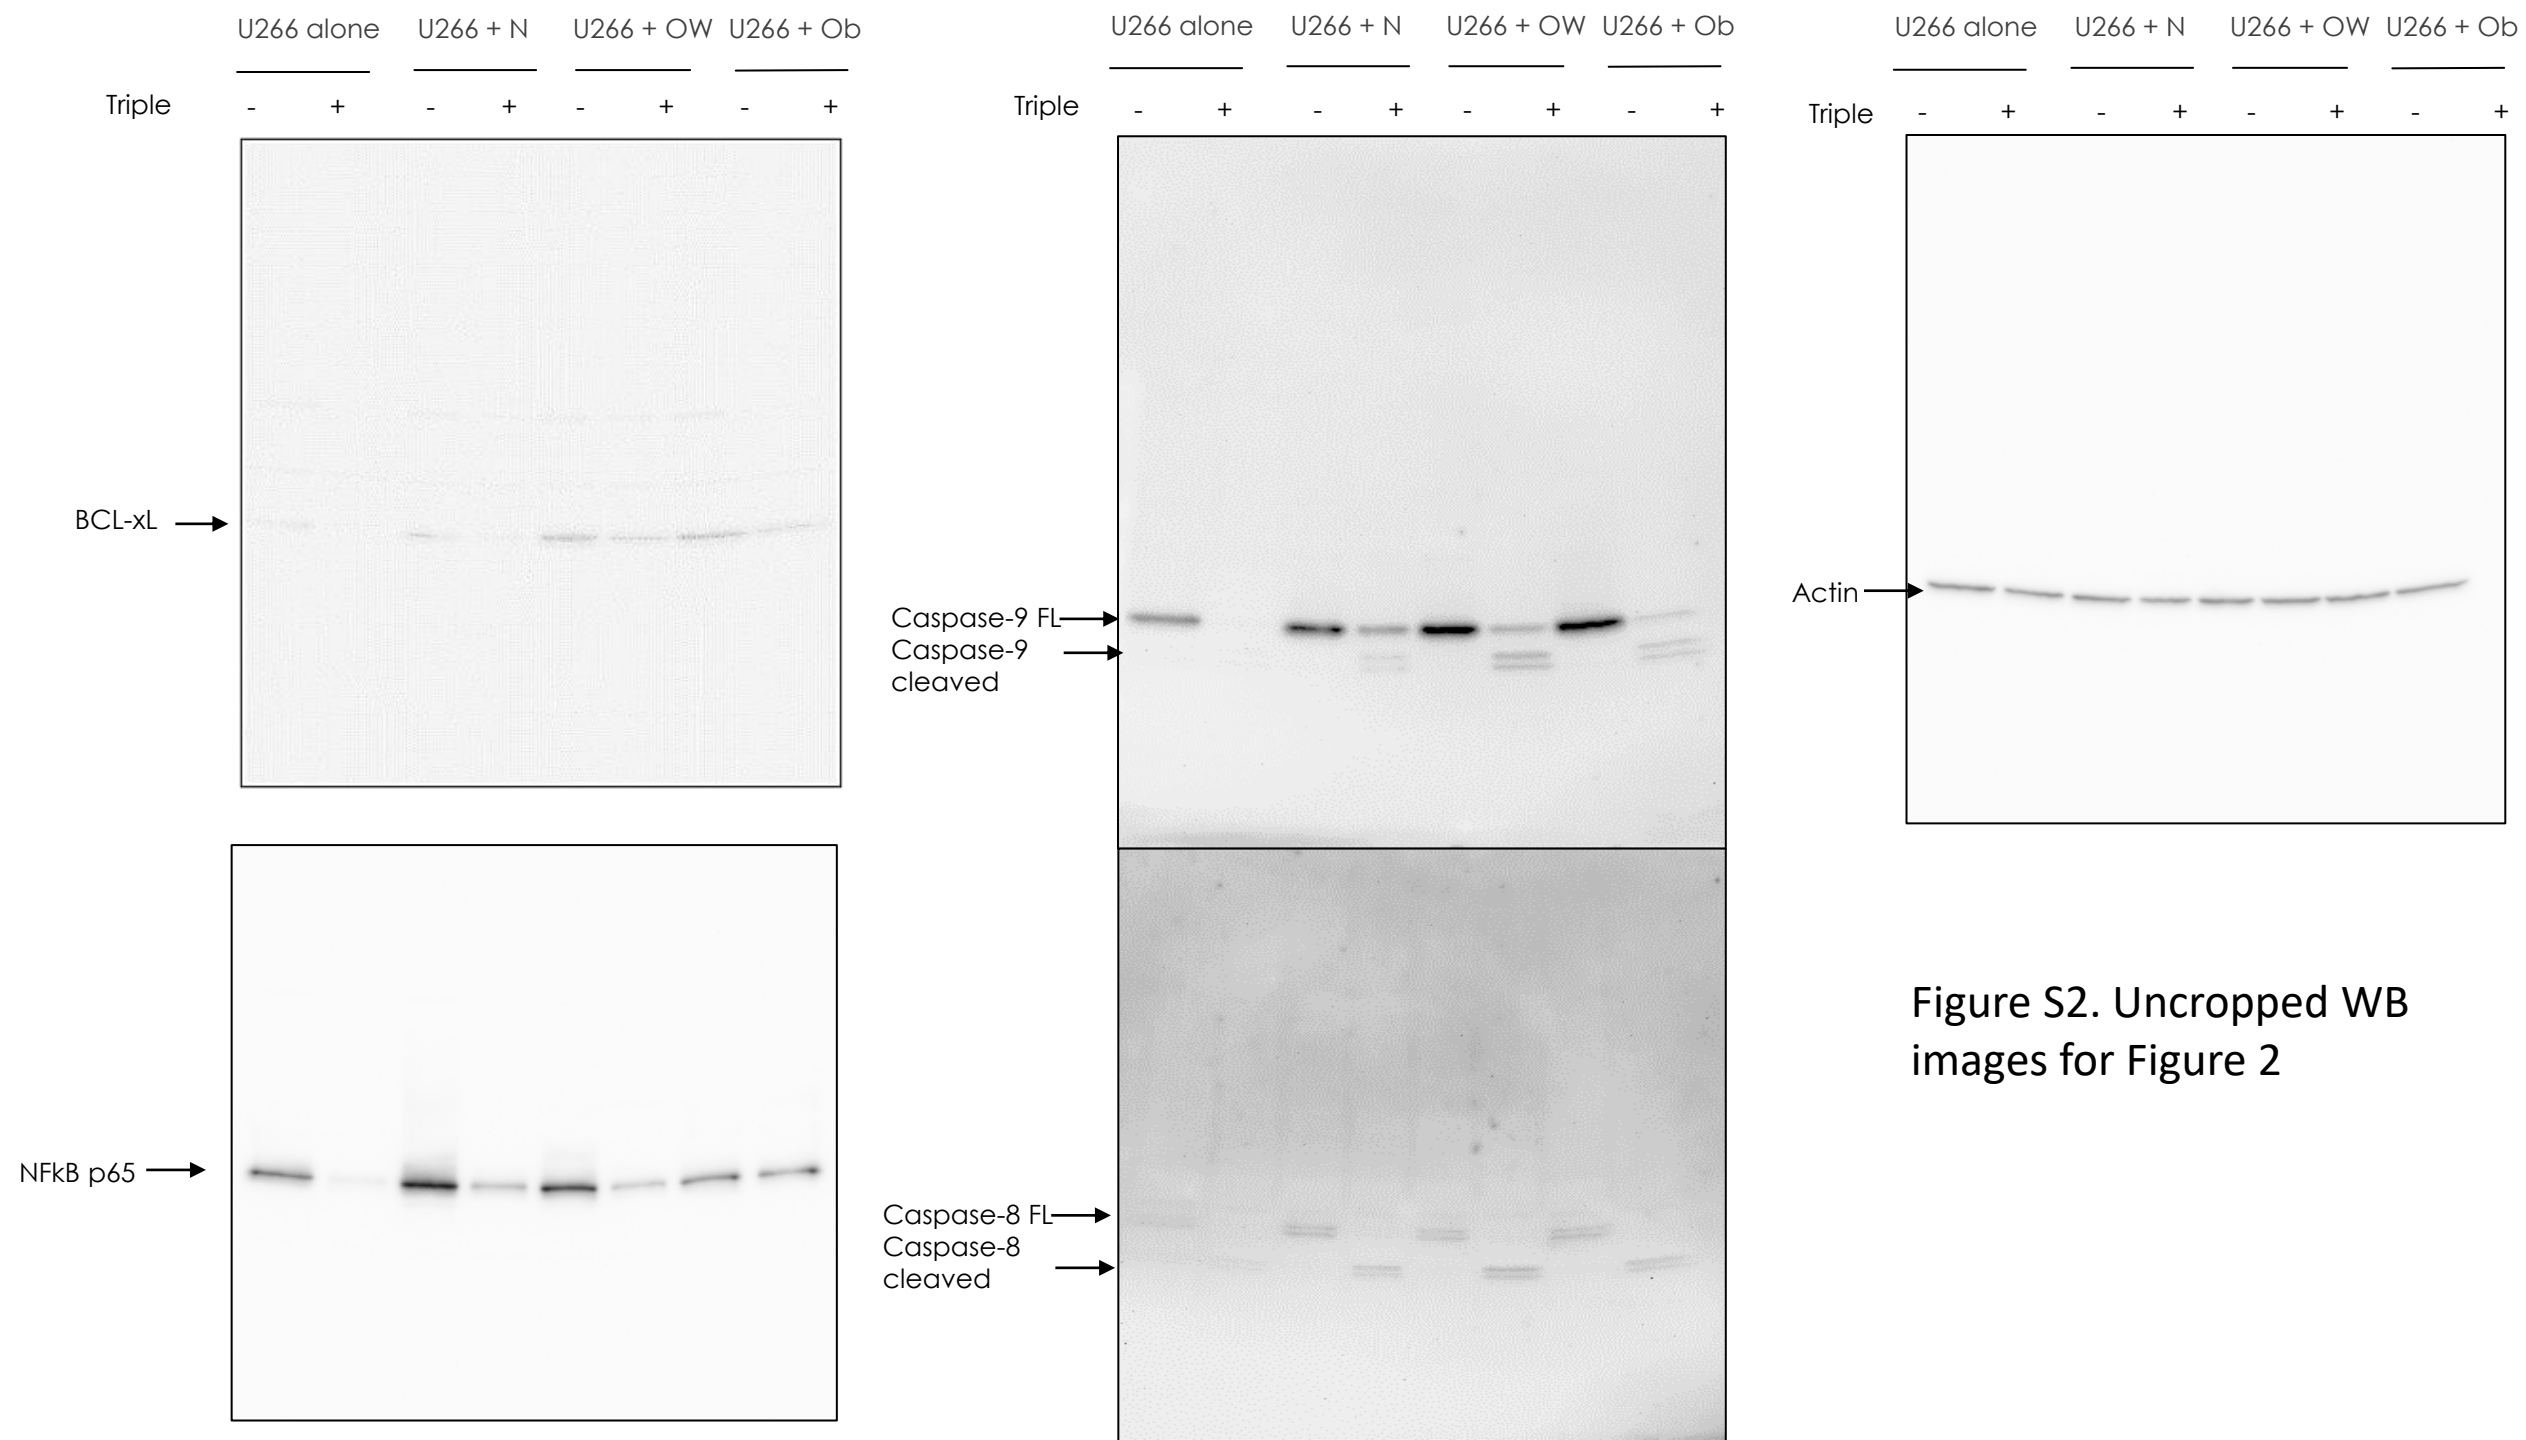

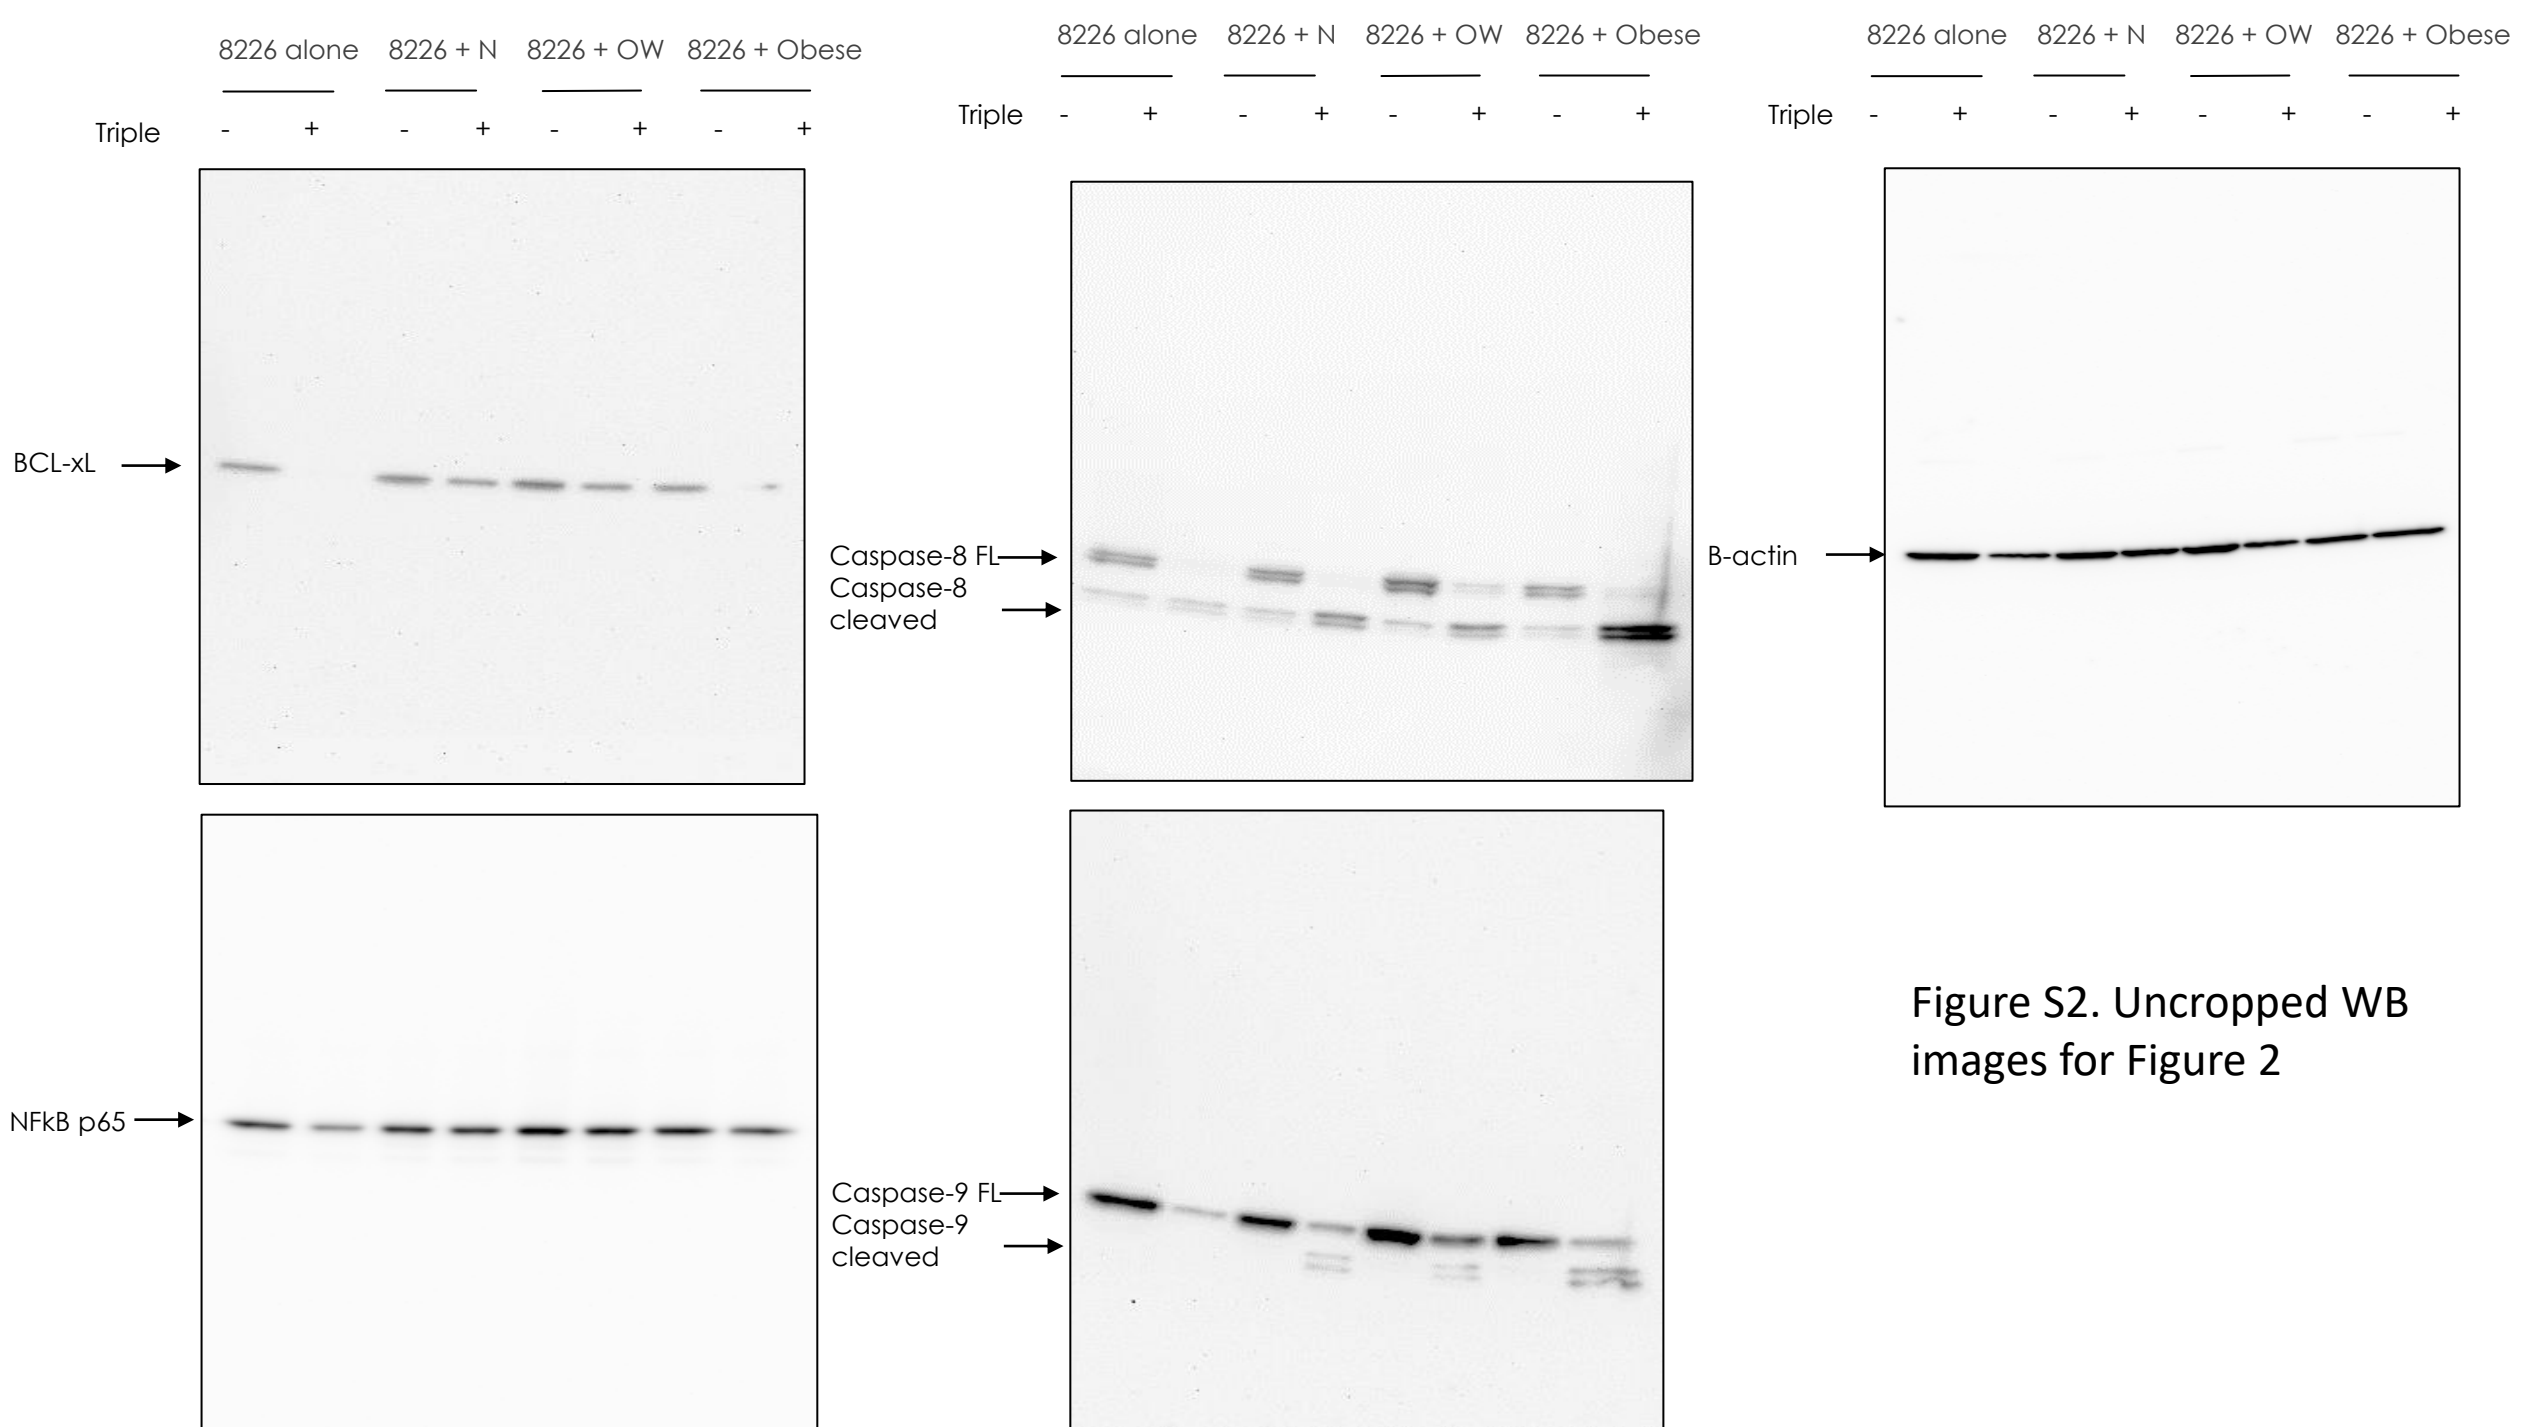

Figure S2. Uncropped WB images for Figure 2

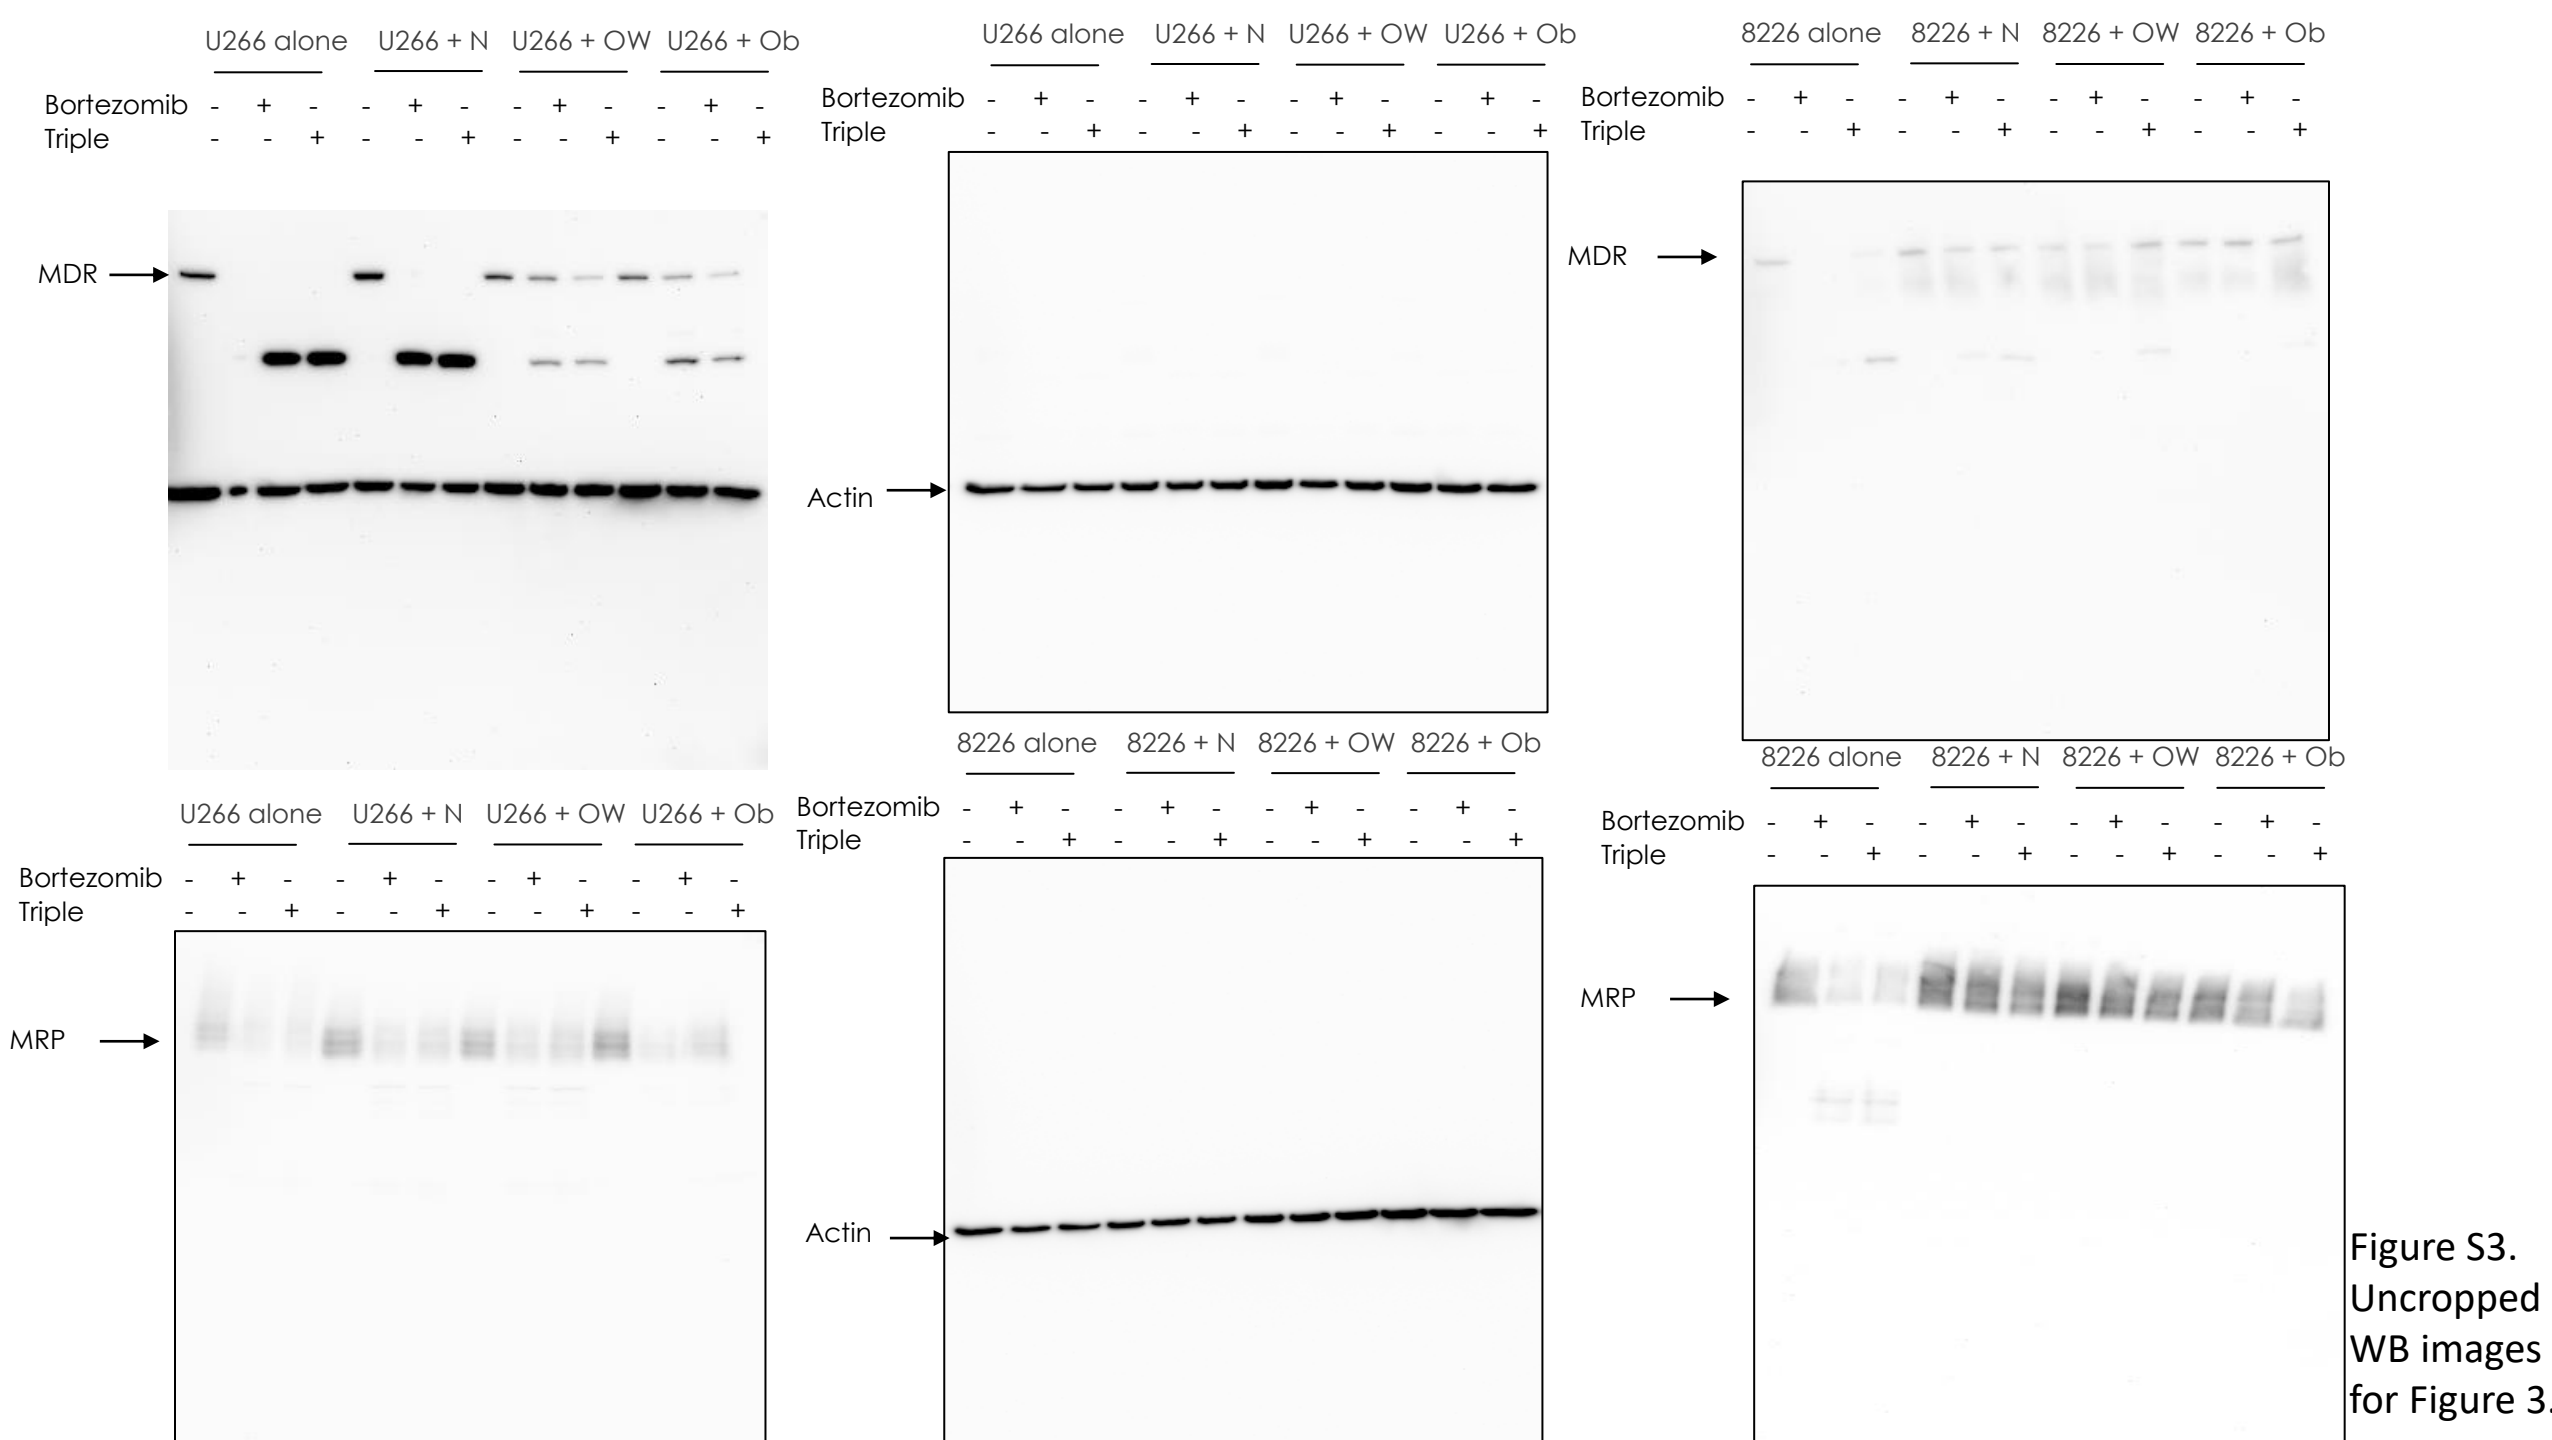

Figure S3.  
Uncropped  
WB images  
for Figure 3.

Normalized fold changes for All Western blots

Figure 1

Phospho-p65

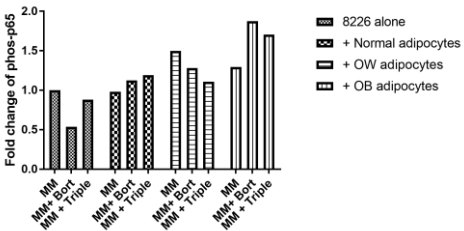

p65

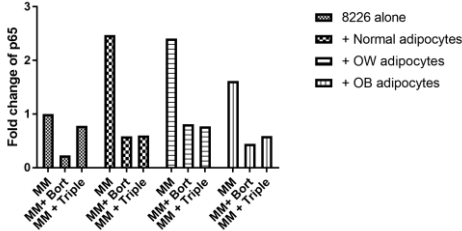

Cleaved Casp 3 (% Full length)

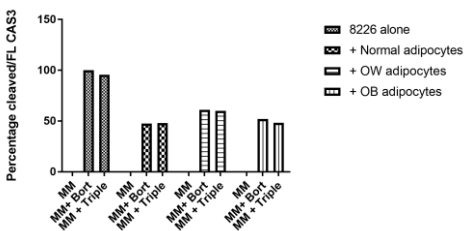

Figure 2A

BCL-xL

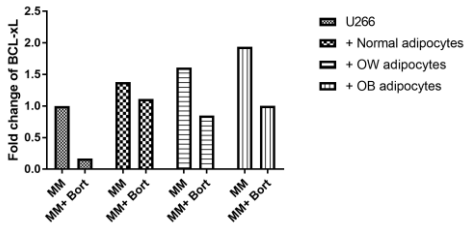

p65

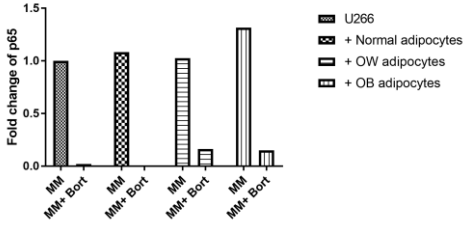

Cleaved Cas8

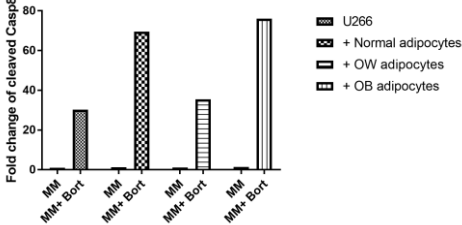

Cleaved Cas9

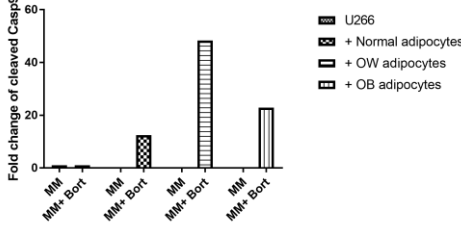

Figure 2B

BCL-xL

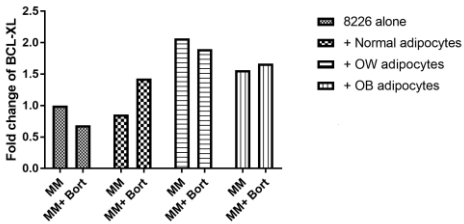

p65

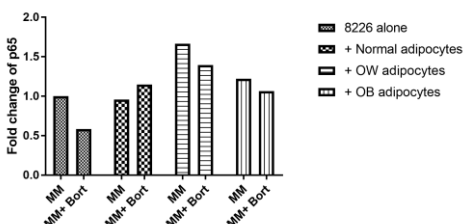

Cleaved Cas8

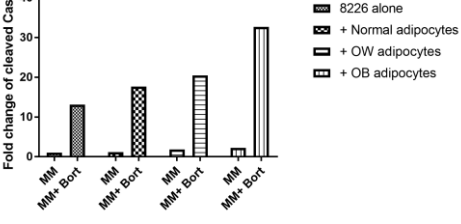

Cleaved Cas9

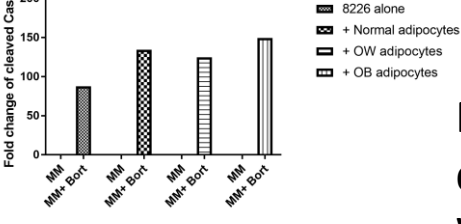

Figure S4. Normalized densitometry for all Western Blots

Normalized fold changes for All Western blots

Figure 2C

BCL-xL

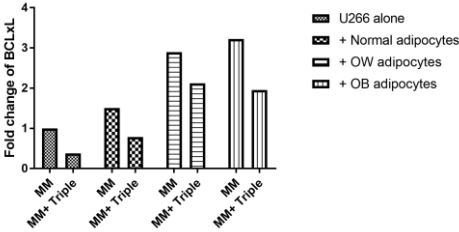

p65

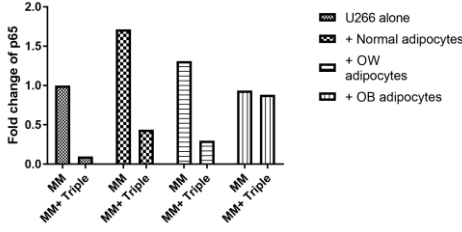

Cleaved Cas8

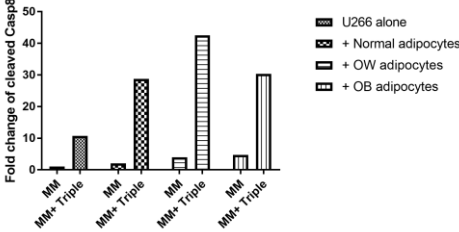

Cleaved Cas9

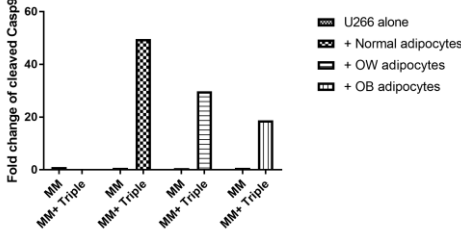

Figure 2D

BCL-xL

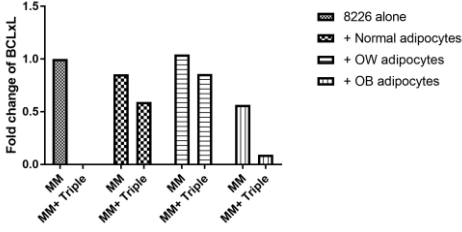

p65

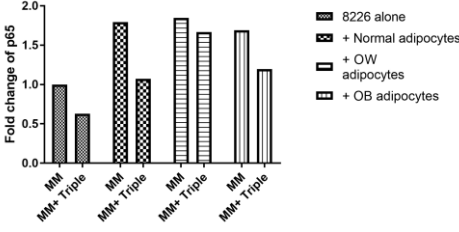

Cleaved Cas8

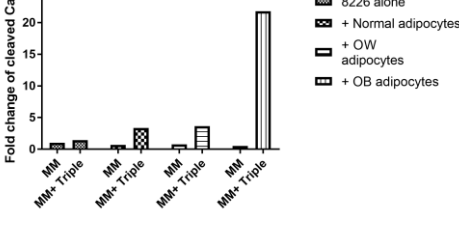

Cleaved Cas9

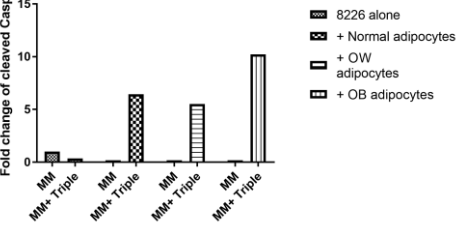

Figure 3

P-gp (U266)

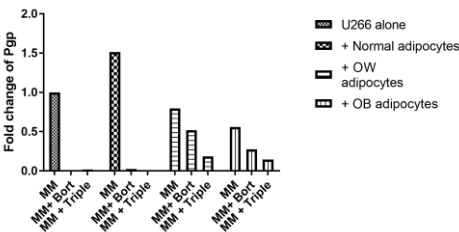

MRP (U266)

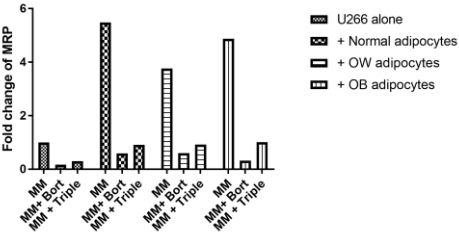

P-gp (8226)

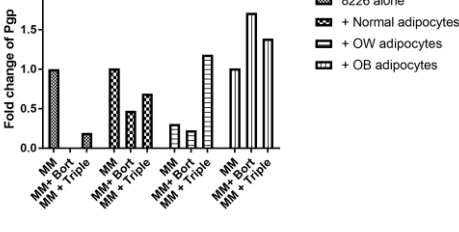

MRP (8226)

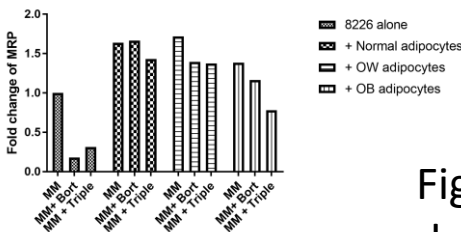

Figure S4. Normalized densitometry for all Western Blots



A.

8226 alone    8226 + Normal    8226 + OW    8226 + Obese

Bortezomib

-   +   -   -   +   -   -   +   -   -   +   -

Triple

-   -   +   -   -   +   -   -   +   -   -   +

Pro-MMP-9

Active MMP9

Pro-MMP2

Active MMP2

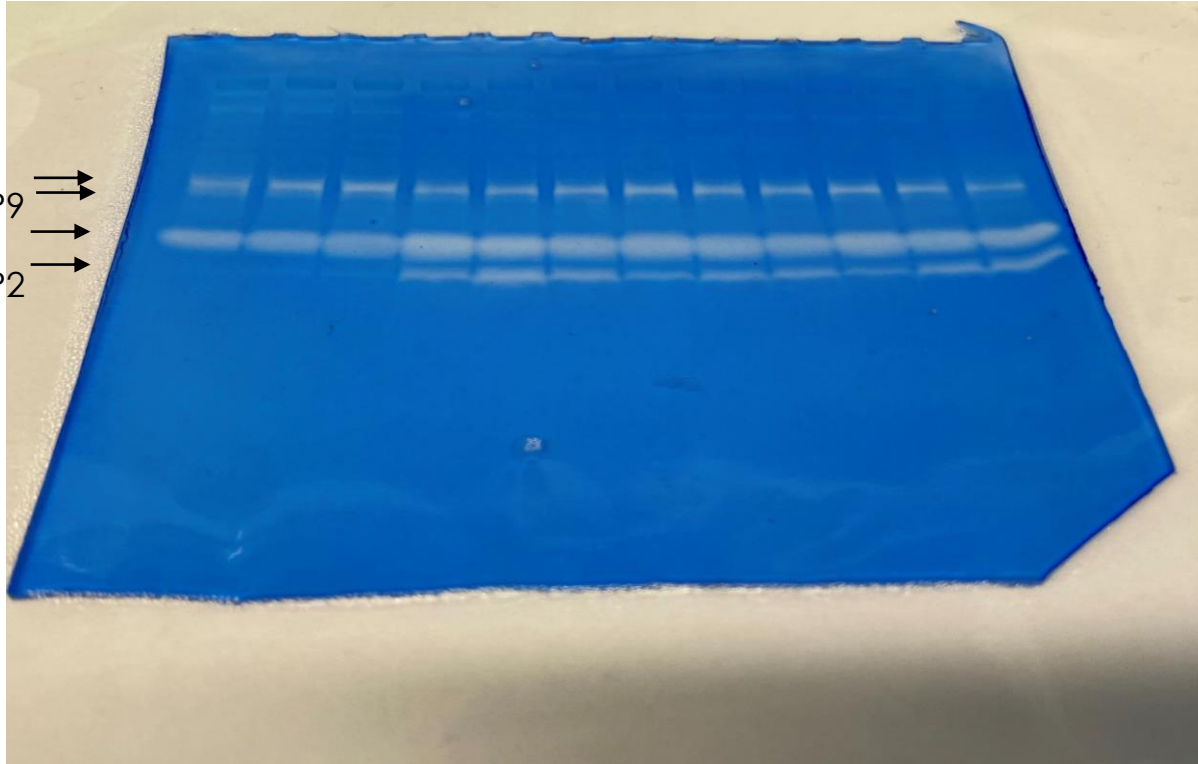

Figure S5: Uncropped zymogram

|            | U266 alone |   |   | U266 + Normal |   |   | U266 + OW |   |   | U266 + Obese |   |   |
|------------|------------|---|---|---------------|---|---|-----------|---|---|--------------|---|---|
| Bortezomib | -          | + | - | -             | + | - | -         | + | - | -            | + | - |
| Triple     | -          | - | + | -             | - | + | -         | - | + | -            | - | + |

Pro-MMP-9 ⇒  
Active MMP9 ⇒  
Pro-MMP2 →  
Active MMP2 →

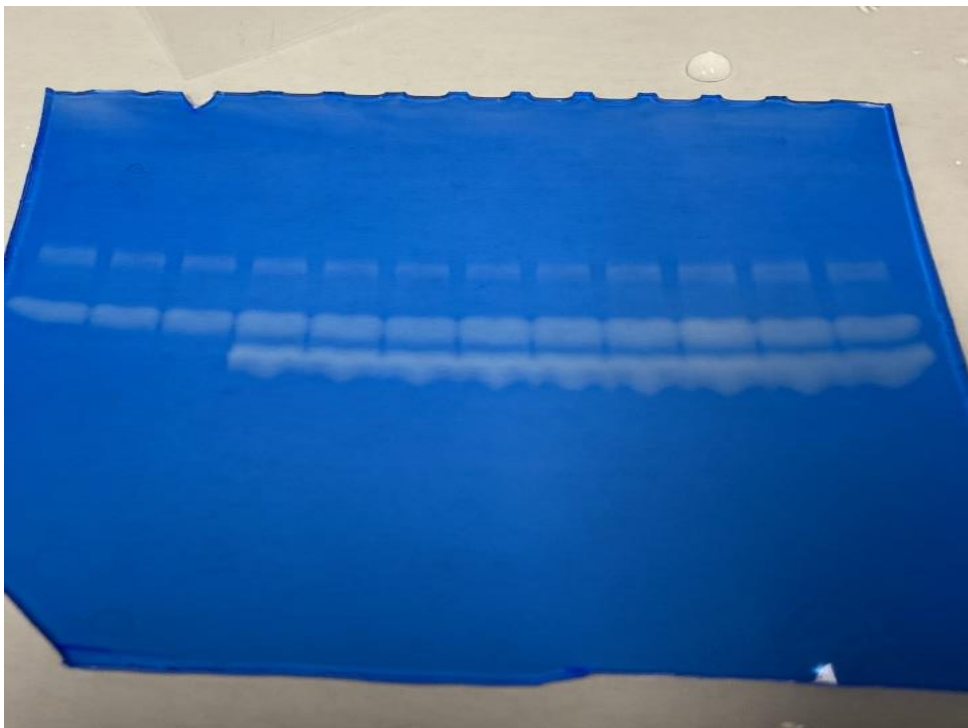

Figure S5. Uncropped zymogram
